# Supplementary material for: DEAD-Box Helicase 4 (Ddx4)+ Stem Cells Sustain Tumor Progression in Non-Serous Ovarian Cancers
Source: PubMed Central journal article supplement (PMC7503840; doi:10.3390/ijms21176096), 2020-08-24
Supplement: ijms-21-06096-s001.pdf [file ijms-21-06096-s001.pdf]

| GROUP       | PATIENT ID | HISTOTYPES                     | AGE | FIGO 2014 STAGE | TUMOR EXTENSION                                                |
|-------------|------------|--------------------------------|-----|-----------------|----------------------------------------------------------------|
| A1 subgroup | #1         | Clear cell ovarian carcinoma   | 62  | Ic1             | Limited to one ovary and surgical spill                        |
|             | #2         | Clear cell ovarian carcinoma   | 63  | Ic2             | Limited to one ovary and on surface                            |
|             | #3         | Clear cell ovarian carcinoma   | 61  | Ic1             | Limited to one ovary and on surface                            |
|             | #4         | Clear cell ovarian carcinoma   | 58  | Ic3             | Limited to both ovaries and positive peritoneal washing        |
|             | #5         | Clear cell ovarian carcinoma   | 56  | Ic3             | Limited to both ovaries and positive peritoneal washing        |
|             | #6         | Mucinous ovarian carcinoma     | 55  | Ic3             | Limited to one ovary and positive peritoneal washing           |
|             | #7         | Mucinous ovarian carcinoma     | 52  | IIa             | Extension on fallopian tubes                                   |
|             | #8         | Endometrioid ovarian carcinoma | 44  | IIb             | Extension on pelvic intraperitoneal tissue                     |
|             | #9         | Endometrioid ovarian carcinoma | 59  | IIb             | Extension on pelvic intraperitoneal tissue                     |
| A2 subgroup | #10        | Clear cell ovarian carcinoma   | 76  | IVb             | Hepatic and inguinal lymphnode metastases                      |
|             | #11        | Clear cell ovarian carcinoma   | 68  | IVb             | Hepatic and inguinal lymphnode metastases                      |
|             | #12        | Clear cell ovarian carcinoma   | 62  | IVb             | Hepatic and inguinal lymphnode metastases                      |
|             | #13        | Clear cell ovarian carcinoma   | 71  | IVb             | Splenic, inguinal, periaortic lymphnode metastases             |
|             | #14        | Clear cell ovarian carcinoma   | 69  | IVb             | Splenic, inguinal, periaortic lymphnode metastases             |
|             | #15        | Clear cell ovarian carcinoma   | 64  | IVb             | Hepatic, splenic, inguinal and periaortic lymphnode metastases |
|             | #16        | Mucinous ovarian carcinoma     | 87  | IVa             | Pleural effusion with positive cytology                        |
|             | #17        | Mucinous ovarian carcinoma     | 74  | IVa             | Pleural effusion with positive cytology                        |
|             | #18        | Mucinous ovarian carcinoma     | 63  | IVa             | Pleural effusion with positive cytology                        |
|             | #19        | Endometrioid ovarian carcinoma | 48  | IVa             | Pleural effusion with positive cytology                        |
|             | #20        | Endometrioid ovarian carcinoma | 53  | IVa             | Pleural effusion with positive cytology                        |
|             | #21        | Endometrioid ovarian carcinoma | 51  | IVa             | Pleural effusion with positive cytology                        |
|             | #22        | Endometrioid ovarian carcinoma | 46  | IVa             | Pleural effusion with positive cytology                        |
|             | #23        | Endometrioid ovarian carcinoma | 68  | IVa             | Pleural effusion with positive cytology                        |

Supplementary Table S1 - Clinical details of OC patients.

**GO enriched functions related to DEGs induced by ML-Ddx4<sup>+</sup> cells from subgroup A1 of OCs**

| <b>GO Term</b> | <b>Description</b>                                   | <b>FDR</b> | <b>Genes</b>                                                                                 |
|----------------|------------------------------------------------------|------------|----------------------------------------------------------------------------------------------|
| GO.0030198     | Extracellular matrix organization                    | 8.40E-04   | <i>TIMP1,TGFB1,LOX,CTGF,LOXL2,SPP1</i>                                                       |
| GO.0001837     | epithelial to mesenchymal transition                 | 8.40E-04   | <i>TGFB1,LOXL2,SNAIL2,HMGA2</i>                                                              |
| GO.0008284     | positive regulation of cell population proliferation | 0.0012     | <i>SIRT1,TIMP1,TGFB1,ID2,IL11,FOXM1,CTGF,HMGA2</i>                                           |
| GO.0008283     | Cell population proliferation                        | 0.0014     | <i>TGFB1,ID2,HPRT1,PES1,CTGF,LOXL2,HMGA2</i>                                                 |
| GO.0042127     | regulation of cell population proliferation          | 0.0039     | <i>SIRT1,TIMP1,TGFB1,ID2,IL11,FOXM1,CTGF,SNAIL2,HMGA2</i>                                    |
| GO.0048522     | positive regulation of cellular process              | 0.0043     | <i>SIRT1,TIMP1,TGFB1,ID2,IL11,HPRT1,SIRT7,FOXM1,SPTBN1,CTGF,CD83,LOXL2,SPP1,SNAIL2,HMGA2</i> |
| GO.0050673     | epithelial cell proliferation                        | 0.0389     | <i>ID2,LOXL2</i>                                                                             |
| GO.0050678     | regulation of epithelial cell proliferation          | 0.0448     | <i>SIRT1,TGFB1,SNAIL2</i>                                                                    |

**GO enriched functions related to DEGs induced by ML-Ddx4<sup>+</sup> cells from subgroup A2 of OCs**

| <b>GO Term</b> | <b>Description</b>                                   | <b>FDR</b> | <b>Genes</b>                                          |
|----------------|------------------------------------------------------|------------|-------------------------------------------------------|
| GO.0042127     | regulation of cell population proliferation          | 9.3E-4     | <i>SIRT1,SIRT2,IL11,ZNF703,SSTR2,CTGF,SNAIL2</i>      |
| GO.0016477     | cell migration                                       | 0.0434     | <i>CTGF,SNAIL2,MDK</i>                                |
| GO.0050679     | positive regulation of epithelial cell proliferation | 0.0291     | <i>SIRT1,ZNF703</i>                                   |
| GO.0030335     | positive regulation of cell migration                | 0.0208     | <i>SIRT1,ZNF703,SNAIL2</i>                            |
| GO.0045595     | regulation of cell differentiation                   | 0.0187     | <i>SIRT1,SIRT2,ZNF703,CTGF,SNAIL2</i>                 |
| GO.0048522     | positive regulation of cellular process              | 0.0179     | <i>SIRT1,RNF125,SIRT2,IL11,ZNF703,CTGF,SNAIL2,MDK</i> |
| GO.0008284     | positive regulation of cell population proliferation | 0.0171     | <i>SIRT1,IL11,ZNF703,CTGF</i>                         |
| GO.0050678     | regulation of epithelial cell proliferation          | 0.0134     | <i>SIRT1,ZNF703,SNAIL2</i>                            |

**Supplementary Table S2** - GO enrichment analysis of differentially expressed genes in A2780 cells co-cultured with Ddx4<sup>+</sup> cells from both patients' subgroups.
